# Supplementary material for: Radiotherapy and Receptor Tyrosine Kinase Inhibition for Solid Cancers (ROCKIT): A Meta-Analysis of 13 Studies
Source: PubMed Central journal article supplement — JNCI Cancer Spectr. 2021 May 19;5(4):pkab050. doi: 10.1093/jncics/pkab050 (PMC8328097; doi:10.1093/jncics/pkab050), 2021-05-19

## SUPPLEMENTARY MATERIALS

### Supplementary Tables

Supplementary Table 1. MOOSE Checklist

| Item No                                     | Recommendation                                                                                             | Reported in Section                |
|---------------------------------------------|------------------------------------------------------------------------------------------------------------|------------------------------------|
| Reporting of background                     |                                                                                                            |                                    |
| 1                                           | Problem definition                                                                                         | Introduction;<br>Methods           |
| 2                                           | Hypothesis statement                                                                                       | Introduction                       |
| 3                                           | Description of study outcome(s)                                                                            | Methods                            |
| 4                                           | Type of exposure or intervention used                                                                      | Methods                            |
| 5                                           | Type of study designs used                                                                                 | Methods;<br>Table 1                |
| 6                                           | Study population                                                                                           | Methods;<br>Table 1                |
| Reporting of search strategy should include |                                                                                                            |                                    |
| 7                                           | Qualifications of searchers (eg, librarians and investigators)                                             | Methods                            |
| 8                                           | Search strategy, including time period included in the synthesis and key words                             | Methods                            |
| 9                                           | Effort to include all available studies, including contact with authors                                    | Methods                            |
| 10                                          | Databases and registries searched                                                                          | Methods;<br>Figure 1               |
| 11                                          | Search software used, name and version, including special features used (eg, explosion)                    | Methods                            |
| 12                                          | Use of hand searching (eg, reference lists of obtained articles)                                           | Methods                            |
| 13                                          | List of citations located and those excluded, including justification                                      | Figure 1;<br>Supplementary Table 2 |
| 14                                          | Method of addressing articles published in languages other than English                                    | Methods                            |
| 15                                          | Method of handling abstracts and unpublished studies                                                       | Methods                            |
| 16                                          | Description of any contact with authors                                                                    | N/A                                |
| Reporting of methods should include         |                                                                                                            |                                    |
| 17                                          | Description of relevance or appropriateness of studies assembled for assessing the hypothesis to be tested | Methods                            |

|                                         |                                                                                                                                                                                                                                                                              |                                      |
|-----------------------------------------|------------------------------------------------------------------------------------------------------------------------------------------------------------------------------------------------------------------------------------------------------------------------------|--------------------------------------|
| 18                                      | Rationale for the selection and coding of data (eg, sound clinical principles or convenience)                                                                                                                                                                                | Methods                              |
| 19                                      | Documentation of how data were classified and coded (eg, multiple raters, blinding and interrater reliability)                                                                                                                                                               | Methods                              |
| 20                                      | Assessment of confounding (eg, comparability of cases and controls in studies where appropriate)                                                                                                                                                                             | Methods                              |
| 21                                      | Assessment of study quality, including blinding of quality assessors, stratification or regression on possible predictors of study results                                                                                                                                   | Methods                              |
| 22                                      | Assessment of heterogeneity                                                                                                                                                                                                                                                  | Methods                              |
| 23                                      | Description of statistical methods (eg, complete description of fixed or random effects models, justification of whether the chosen models account for predictors of study results, dose-response models, or cumulative meta-analysis) in sufficient detail to be replicated | Methods                              |
| 24                                      | Provision of appropriate tables and graphics                                                                                                                                                                                                                                 | Figures 1-2;<br>Tables 1-3           |
| Reporting of results should include     |                                                                                                                                                                                                                                                                              |                                      |
| 25                                      | Graphic summarizing individual study estimates and overall estimate                                                                                                                                                                                                          | Figures 2;<br>Tables 2-3             |
| 26                                      | Table giving descriptive information for each study included                                                                                                                                                                                                                 | Table 2                              |
| 27                                      | Results of sensitivity testing (eg, subgroup analysis)                                                                                                                                                                                                                       | Results;<br>Figure 2                 |
| 28                                      | Indication of statistical uncertainty of findings                                                                                                                                                                                                                            | Results;<br>Figures 2;<br>Tables 2-3 |
| Reporting of discussion should include  |                                                                                                                                                                                                                                                                              |                                      |
| 29                                      | Quantitative assessment of bias (eg, publication bias)                                                                                                                                                                                                                       | Methods                              |
| 30                                      | Justification for exclusion (eg, exclusion of non-English language citations)                                                                                                                                                                                                | Methods                              |
| 31                                      | Assessment of quality of included studies                                                                                                                                                                                                                                    | Methods;<br>Figure 1                 |
| Reporting of conclusions should include |                                                                                                                                                                                                                                                                              |                                      |
| 32                                      | Consideration of alternative explanations for observed results                                                                                                                                                                                                               | Discussion                           |
| 33                                      | Generalization of the conclusions (ie, appropriate for the data presented and within the domain of the literature review)                                                                                                                                                    | Conclusion                           |
| 34                                      | Guidelines for future research                                                                                                                                                                                                                                               | Discussion;<br>Conclusion            |
| 35                                      | Disclosure of funding source                                                                                                                                                                                                                                                 | Title Page                           |

**Supplementary Table 2. Rationale for exclusion of individual studies following initial screening process<sup>a</sup>**

| <b>Author name</b> | <b>Study Name</b> | <b>PMID</b> | <b>Year</b> | <b>Reason for exclusion</b>                                       |
|--------------------|-------------------|-------------|-------------|-------------------------------------------------------------------|
| Kelly              | SWOG S0023        | 18378568    | 2008        | RTKi was delivered sequentially, rather than concurrently with RT |
| Sweigert           |                   | 27511844    | 2016        | RTKi and radiotherapy are given in both arms                      |
| Ghi                |                   | 28911070    | 2017        | RTKi and radiotherapy are given in both arms                      |
| Govindan           | Trial 30407       | 21747084    | 2011        | Did not provide HR for survival                                   |
| Lefebvre           | TREMP LIN         | 23341517    | 2013        | Did not provide HR for survival                                   |
| Salma              |                   | 21330337    | 2011        | Did not provide HR for survival                                   |
| Tao                | GORTEC 2007-01    | 29878867    | 2018        | RTKi and radiotherapy are given in both arms                      |
| Hammell            | LAP-07            | 27139057    | 2016        | RTKi was delivered sequentially, rather than concurrently with RT |
| Gillison           | RTOG 1016         | 30449625    | 2018        | RT was given via accelerated fractionation in both arms           |
| Edelman            | RTOG 0839         | 28629896    | 2017        | Did not provide HR for survival                                   |

<sup>a</sup>RTKi, receptor tyrosine kinase inhibitor; HR, hazard ratio, RT, radiotherapy

# Supplementary Figures

**Supplementary Figure 1. Mechanism of Action of Small Molecule and Antibody RTKi's.**

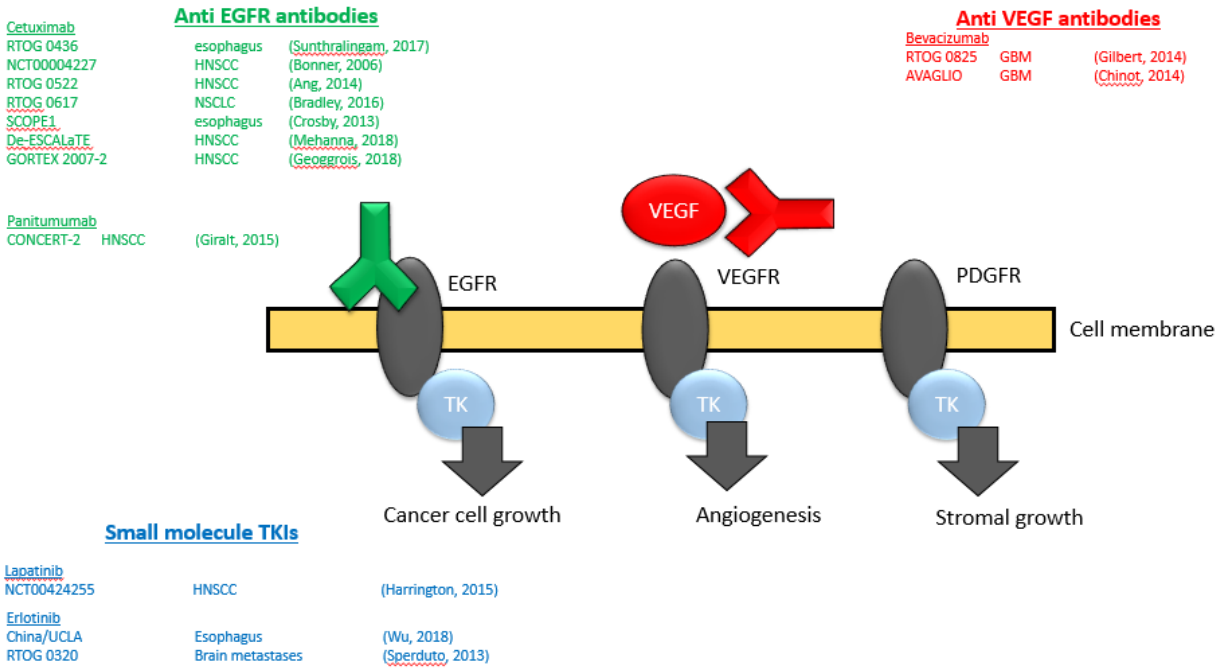

**Supplementary Figure 2. Bias in the articles evaluated.**

|                      | Random Sequence Generation (Selection bias) | Allocation Concealment (Selection bias) | Blinding (Performance bias and detection bias): Survival | Blinding (Performance bias and detection bias): Toxicity | Incomplete Outcome Data (Attrition bias): Survival | Incomplete Outcome Data (Attrition bias): Toxicity | Selective reporting (Reporting bias) | Other Bias |
|----------------------|---------------------------------------------|-----------------------------------------|----------------------------------------------------------|----------------------------------------------------------|----------------------------------------------------|----------------------------------------------------|--------------------------------------|------------|
| Harrington et al     | ~                                           | -                                       | -                                                        | -                                                        | ~                                                  | ~                                                  | ~                                    | ~          |
| Wu et al             | ~                                           | -                                       | -                                                        | NA                                                       | -                                                  | NA                                                 | ~                                    | V          |
| Sperduto et al       | ~                                           | -                                       | -                                                        | -                                                        | -                                                  | -                                                  | -                                    | -          |
| Ang et al            | ~                                           | -                                       | -                                                        | -                                                        | -                                                  | -                                                  | -                                    | -          |
| Bradley et al        | -                                           | -                                       | -                                                        | -                                                        | -                                                  | -                                                  | -                                    | -          |
| Crosby et al         | ~                                           | -                                       | -                                                        | -                                                        | -                                                  | -                                                  | -                                    | -          |
| Suntharalingam et al | -                                           | -                                       | -                                                        | NA                                                       | -                                                  | NA                                                 | -                                    | -          |
| Bonner et al         | ~                                           | -                                       | -                                                        | NA                                                       | -                                                  | NA                                                 | -                                    | -          |
| Chinot et al         | ~                                           | -                                       | -                                                        | -                                                        | -                                                  | -                                                  | -                                    | -          |
| Gilbert et al        | ~                                           | -                                       | -                                                        | NA                                                       | -                                                  | NA                                                 | -                                    | -          |
| Mehanna et al        | ~                                           | -                                       | -                                                        | NA                                                       | -                                                  | NA                                                 | -                                    | -          |
| Geoffris et al       | -                                           | -                                       | -                                                        | NA                                                       | -                                                  | NA                                                 | -                                    | -          |
| Giralt et al         | -                                           | -                                       | -                                                        | NA                                                       | -                                                  | NA                                                 | -                                    | -          |

Supplementary Figure 3. Funnel plots depicting bias of hazard ratio analysis (A) and relative risk analysis (B).

A

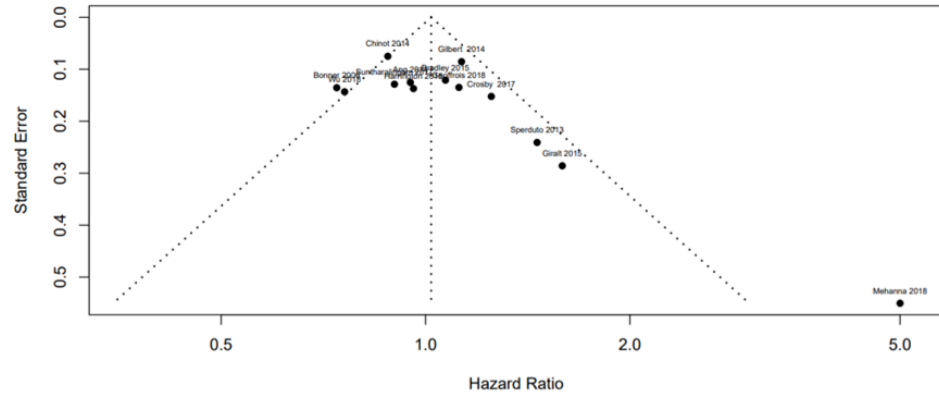

B

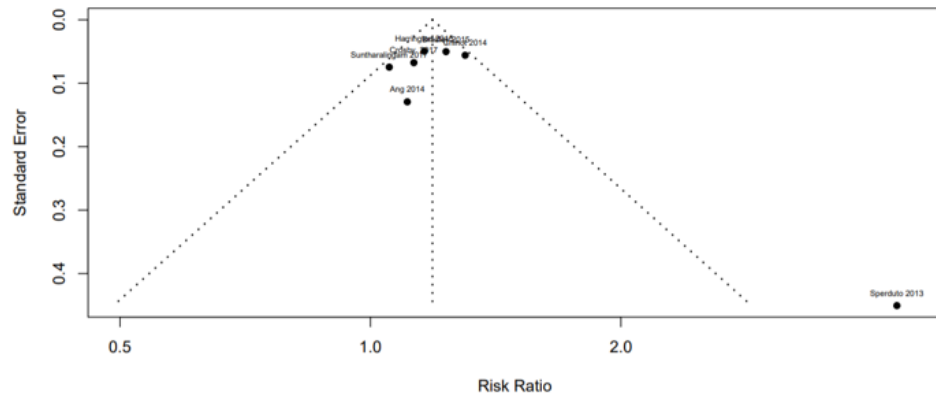

Supplement: pkab050_supplementary_data.pdf [file pkab050_supplementary_data.pdf]
